# Supplementary material for: Hypoxia-inducible factor 2α is a negative regulator of osteoblastogenesis and bone mass accrual
Source: PubMed Central journal article supplement (PMC6382776; doi:10.1038/s41413-019-0045-z), 2019-02-21

A.

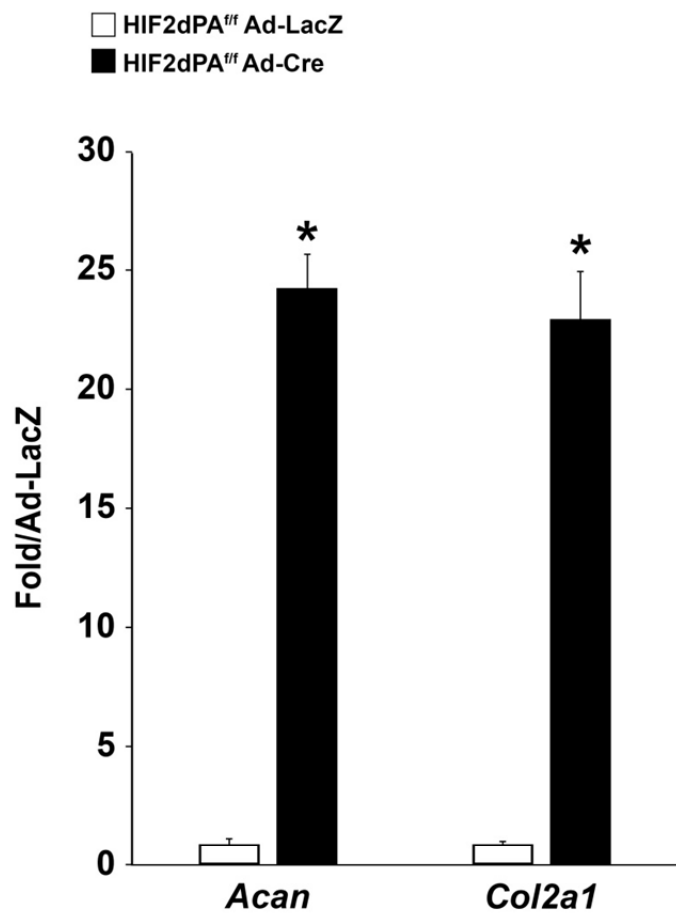

B.

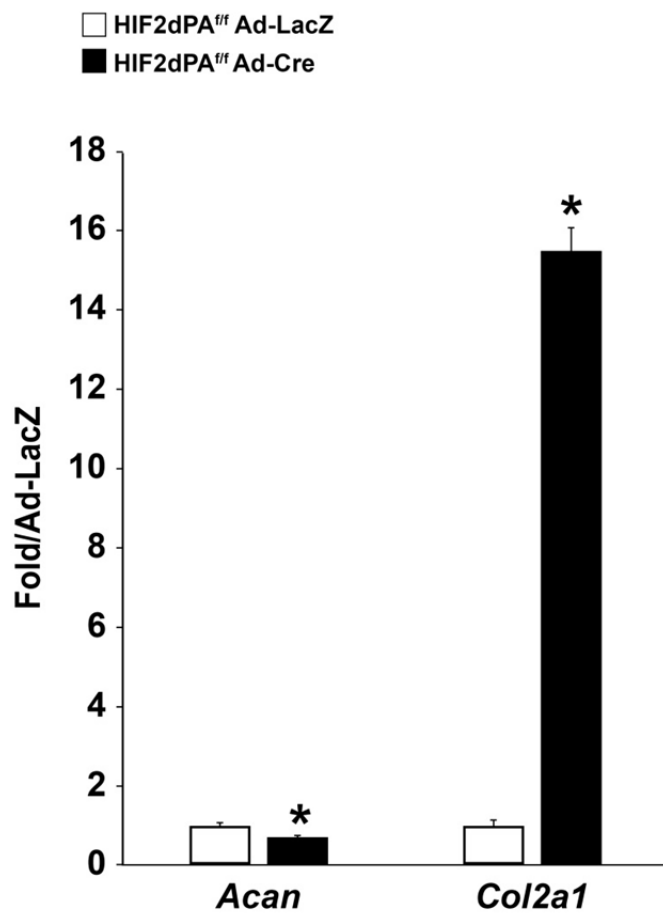

A.

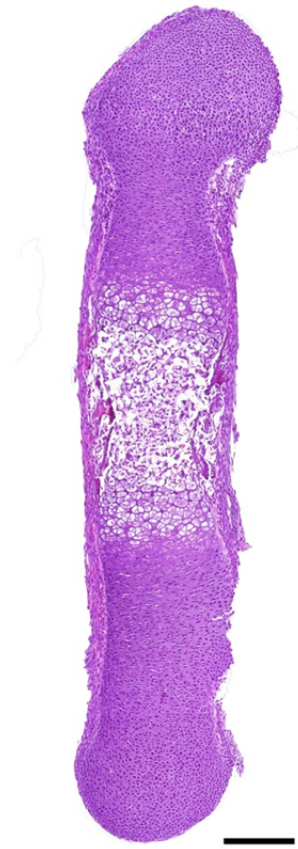

HIF2dPA<sup>f/+</sup>

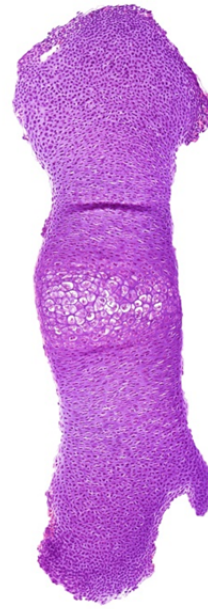

PRX-HIF2dPA<sup>f/+</sup>

B.

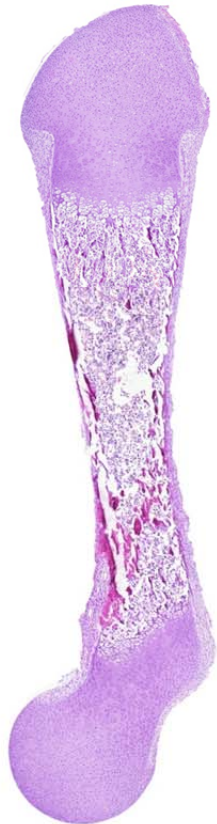

HIF2dPA<sup>f/+</sup>

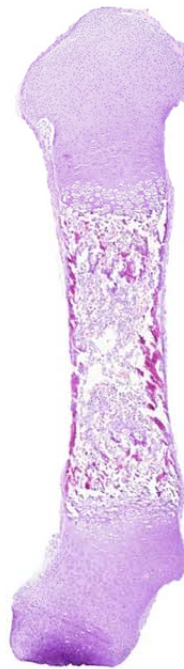

PRX-HIF2dPA<sup>f/+</sup>

A.

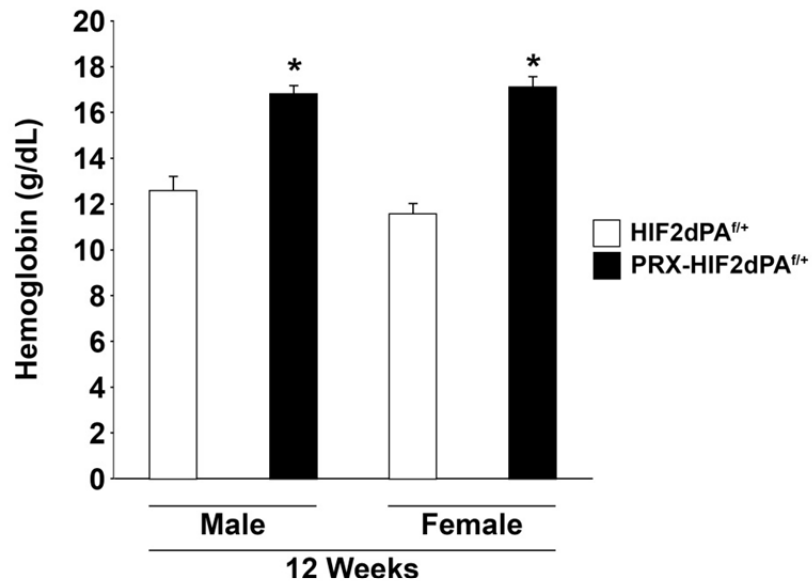

B.

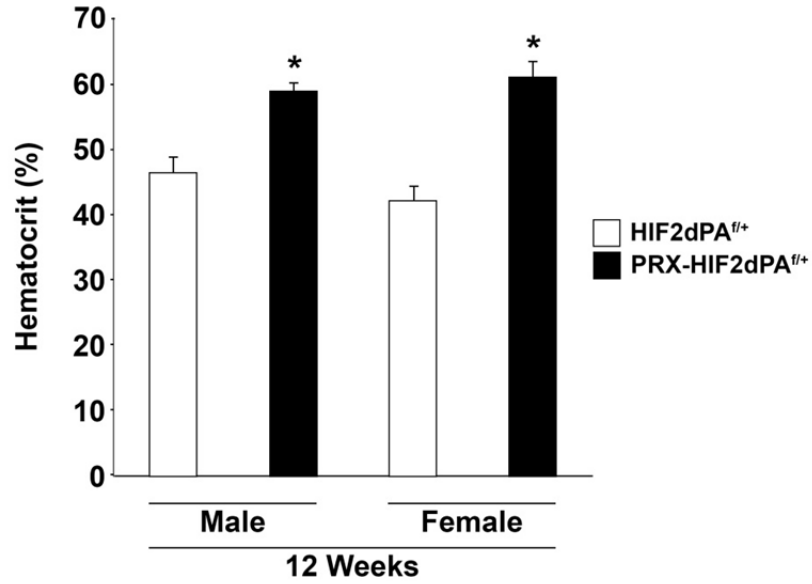

C.

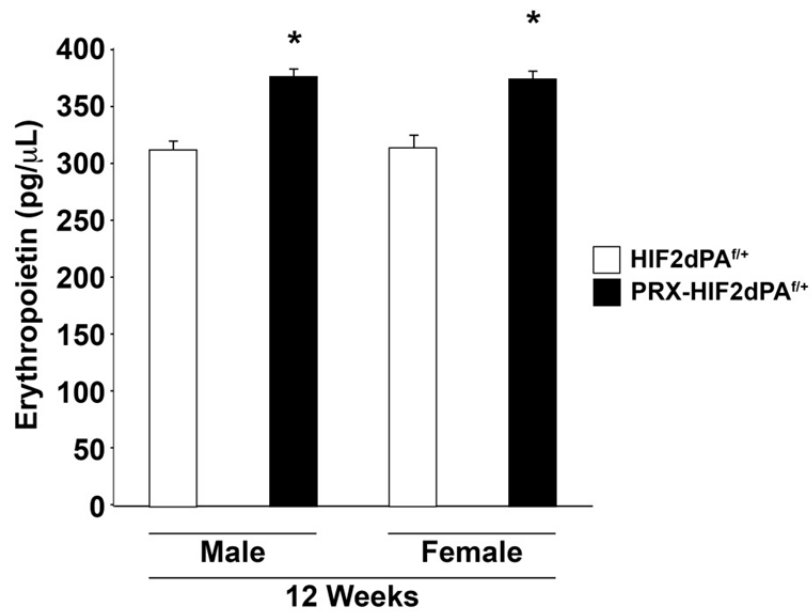

Supplementary Fig. 4

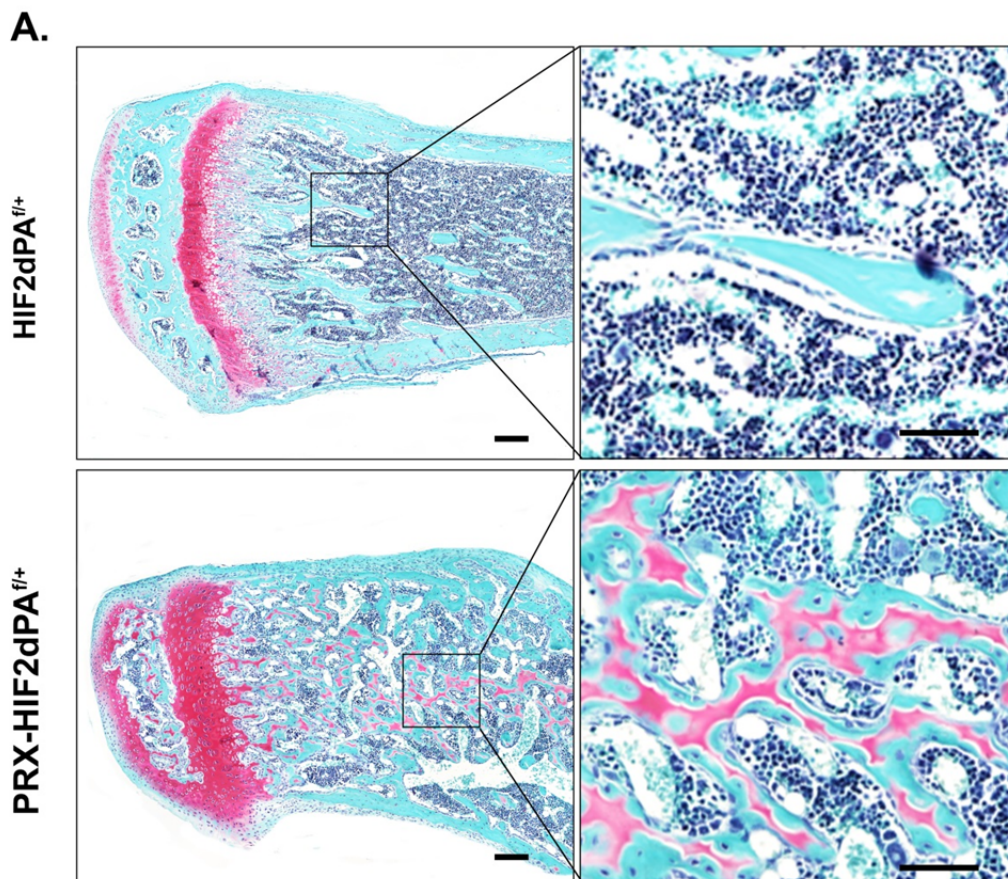

□ HIF2dPA<sup>fl/+</sup> ■ PRX-HIF2dPA<sup>fl/+</sup>

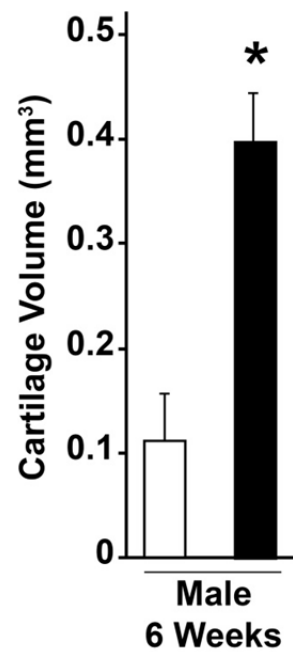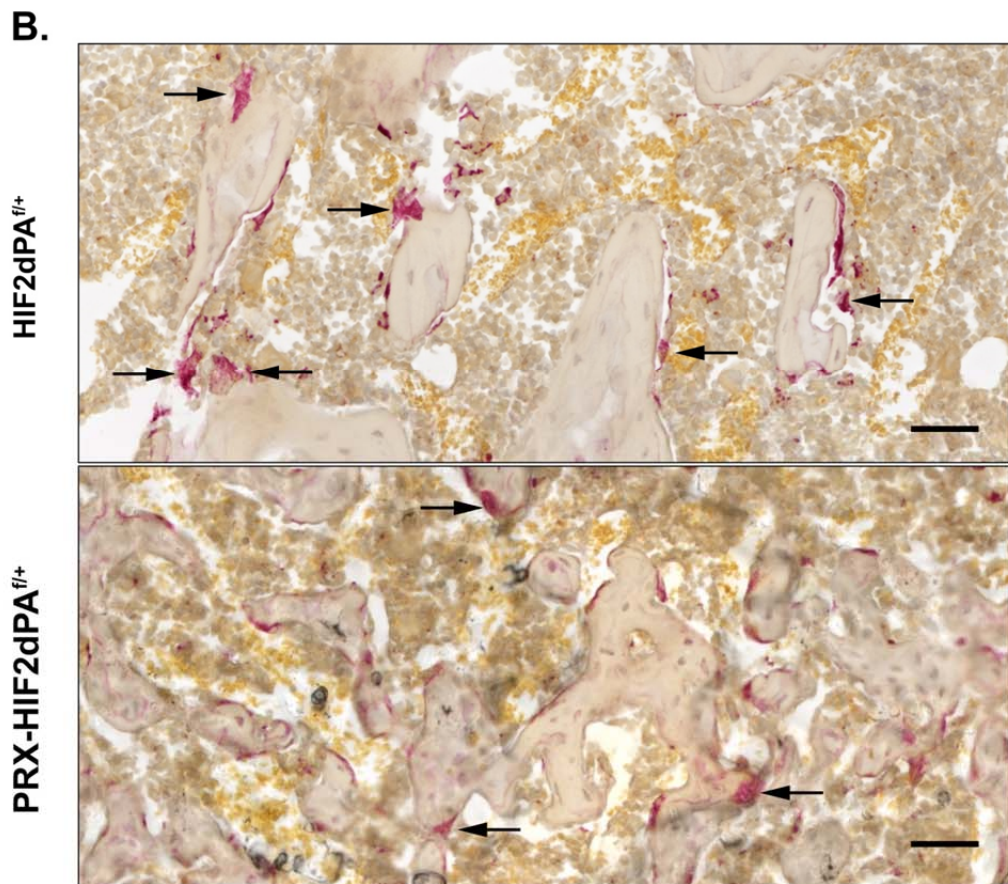

□ HIF2dPA<sup>fl/+</sup> ■ PRX-HIF2dPA<sup>fl/+</sup>

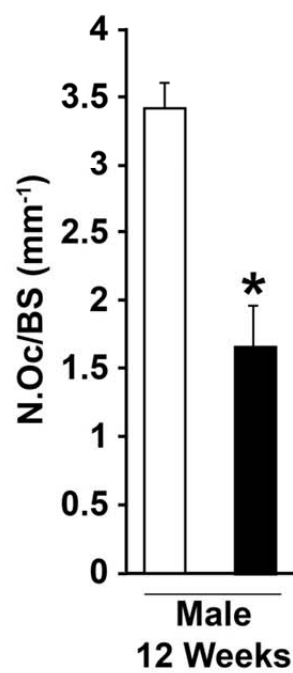

A.

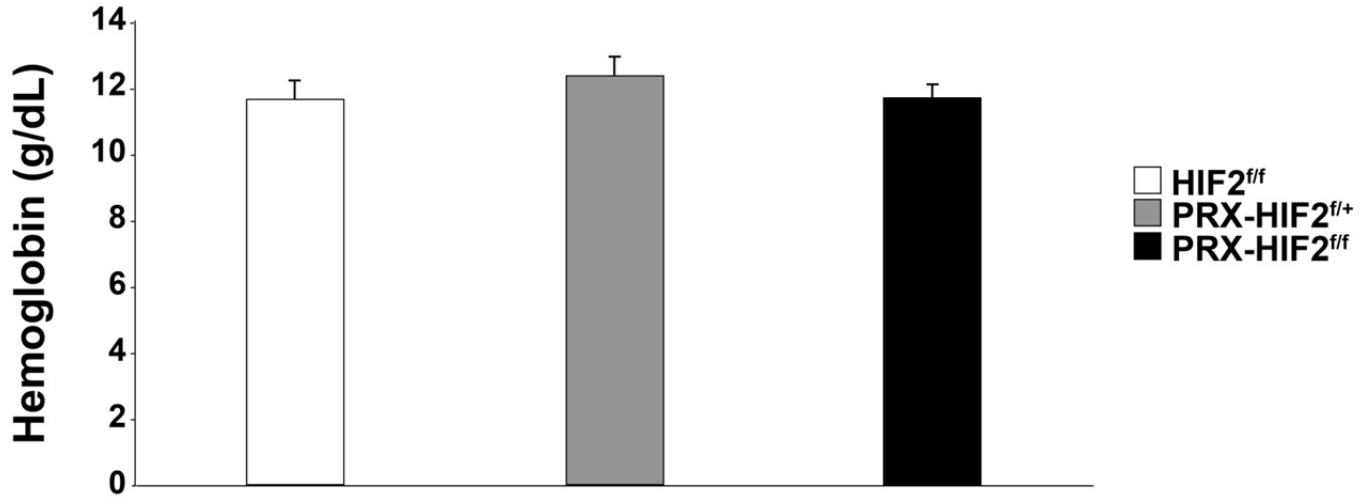

B.

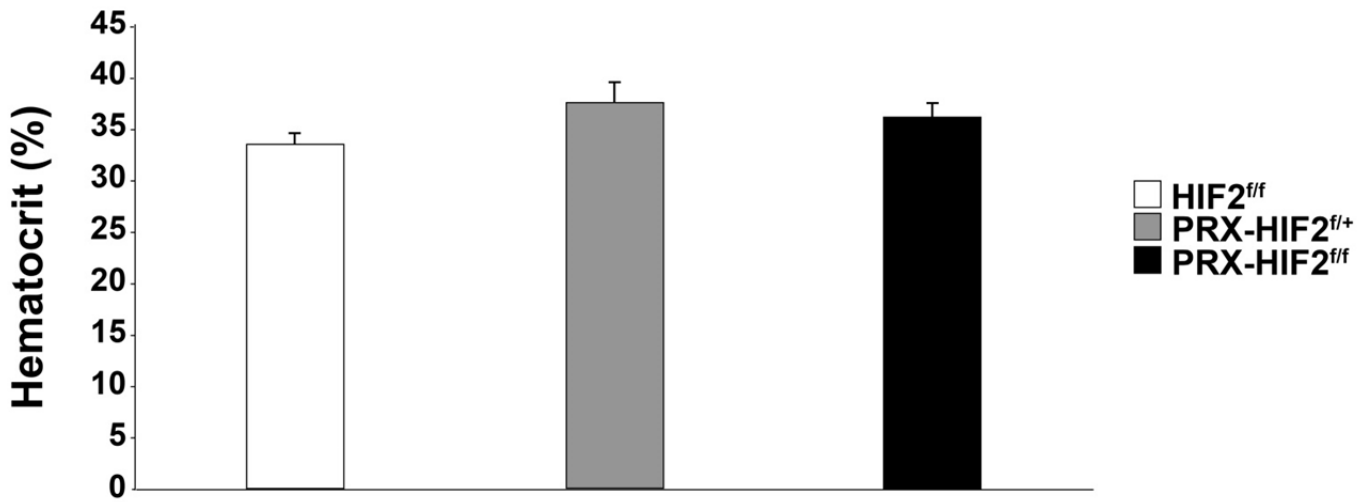

C.

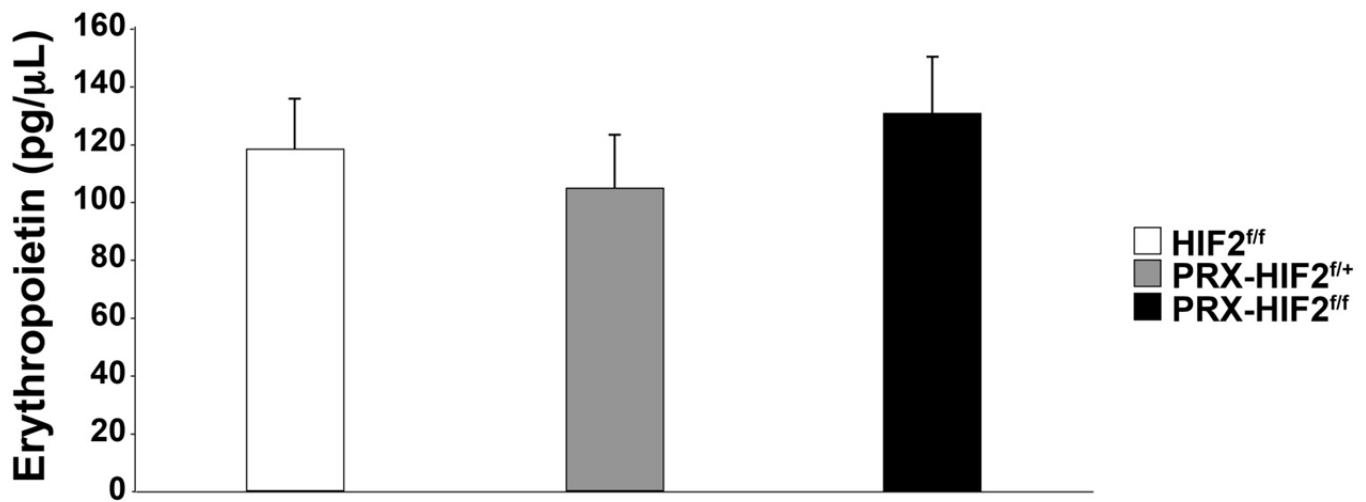

A.

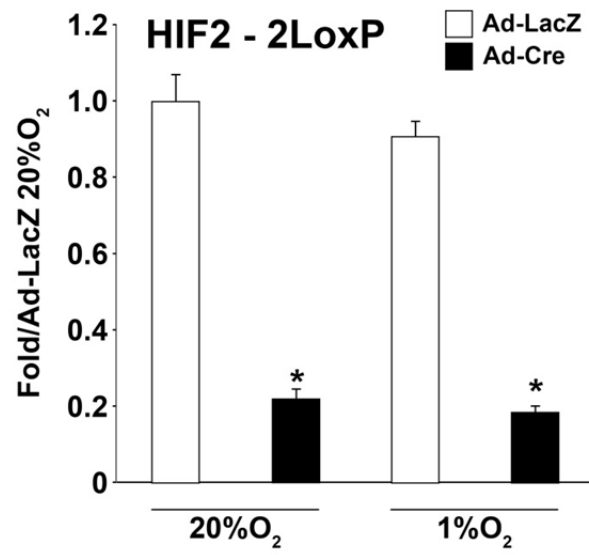

B.

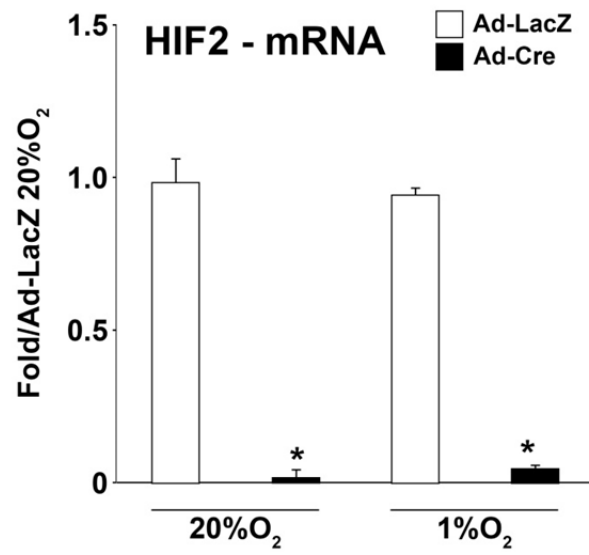

C.

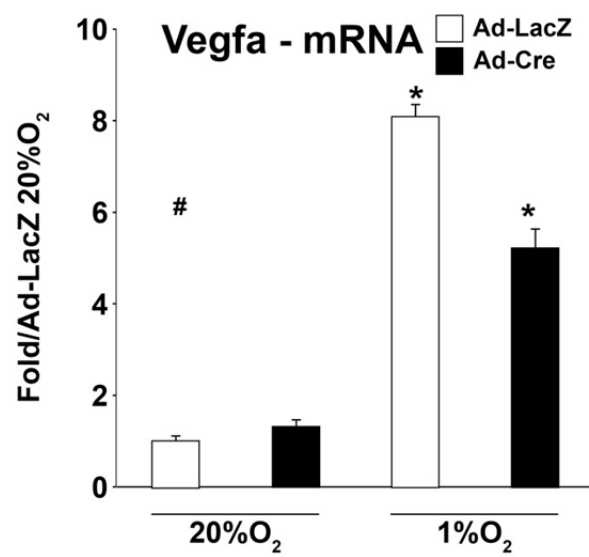



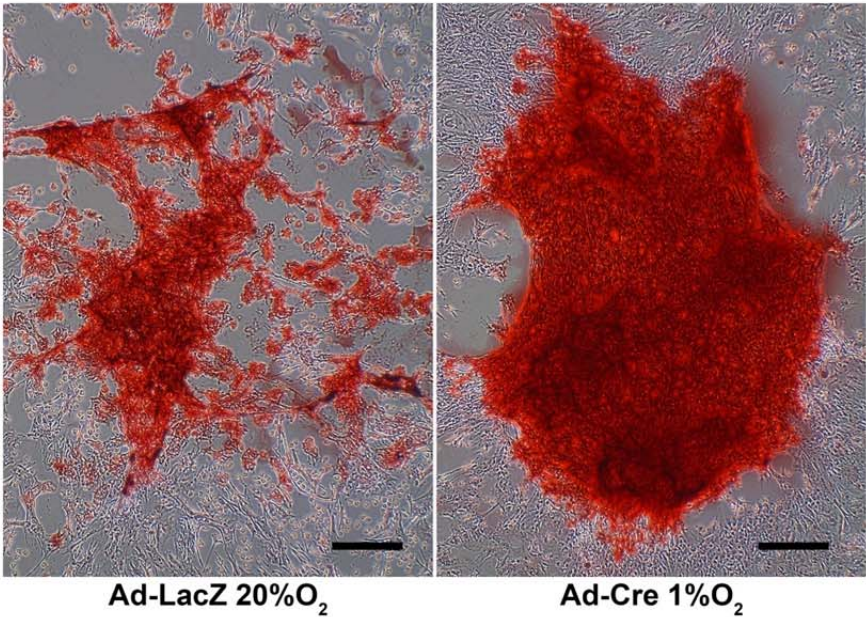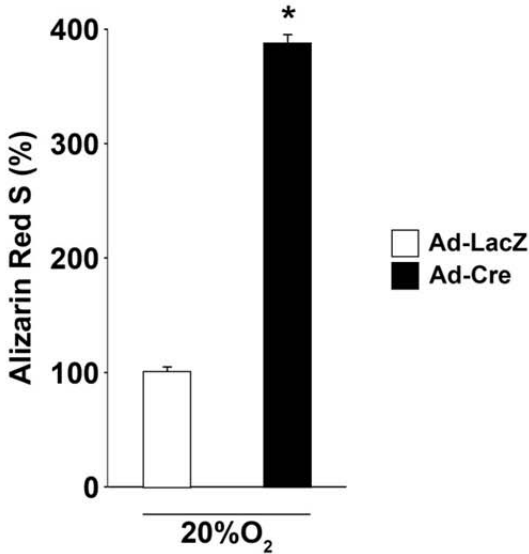

A.

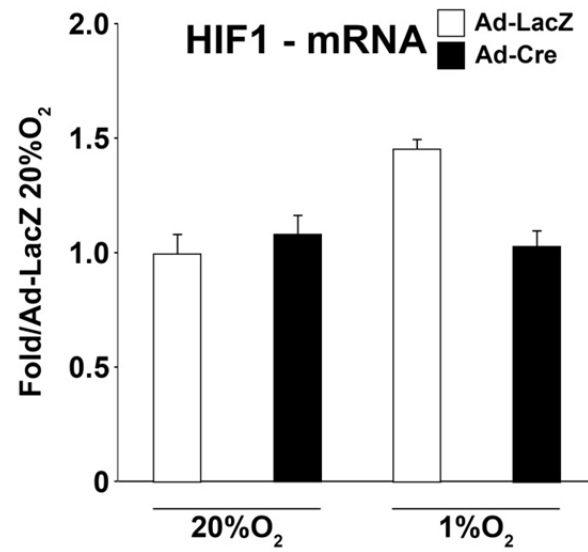

B.

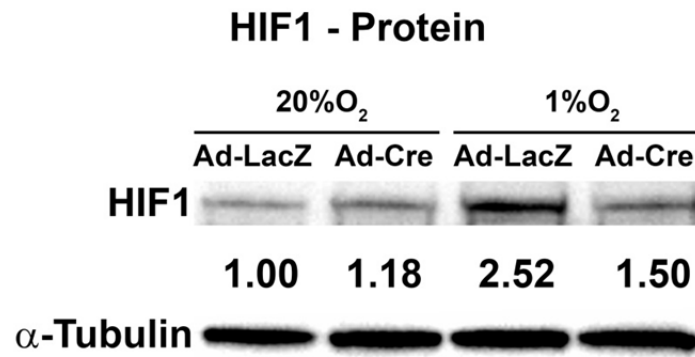

C.

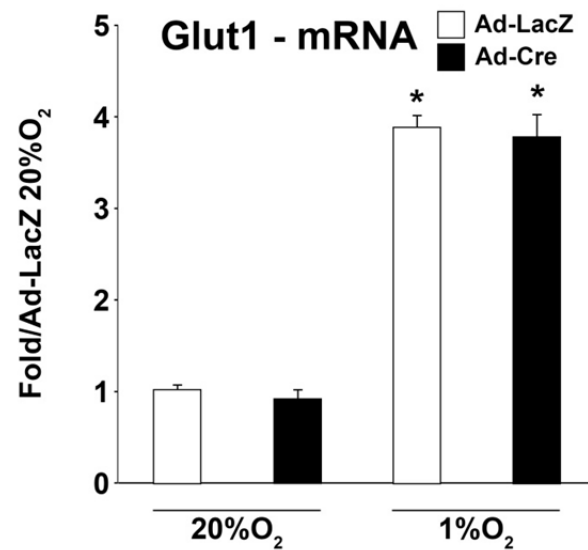



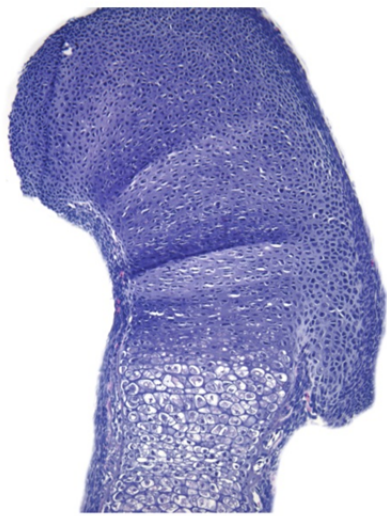

PRX-HIF1<sup>f/+</sup>-HIF2<sup>f/+</sup>

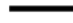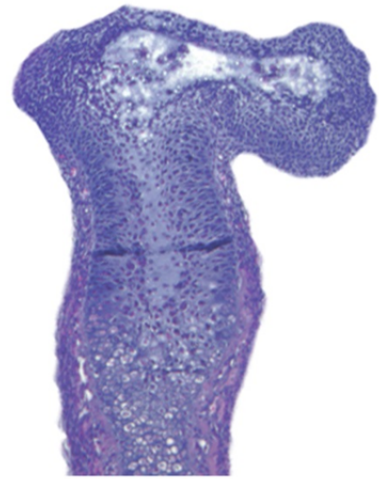

PRX-HIF1<sup>f/f</sup>-HIF2<sup>f/f</sup>

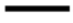

Supplement: 41413_2019_45_MOESM1_ESM.pdf [file 41413_2019_45_MOESM1_ESM.pdf]
